# Supplementary material for: One-pot bioinspired synthesis of all-inclusive protein–protein nanoflowers for point-of-care bioassay: detection of E. coli O157:H7 from milk
Source: Royal Society of Chemistry journal article supplement (doi:10.1039/c6nr06870g), 2016-01-01
Supplement: c6nr06870g1.pdf [file c6nr06870g1.pdf]

## Supporting Information

# One-pot bioinspired synthesis of all-inclusive protein-protein nanoflowers for point-of-care bioassay: Detection of *E. coli* O157:H7 from milk

Ranfeng Ye<sup>a,b</sup>, Chengzhou Zhu<sup>b</sup>, Yang Song<sup>b</sup>, Junhua Song<sup>b</sup>, Shaofang Fu<sup>b</sup>, Qian Lu<sup>b</sup>, Xu Yang<sup>a</sup>, Mei-Jun Zhu<sup>c</sup>, Dan Du<sup>a,b\*</sup>, He Li<sup>b,d\*</sup>, Yuehe Lin<sup>b\*</sup>

*a. College of Chemistry and College of Life Sciences, Central China Normal University, Wuhan 430079, China.*

*b. School of Mechanical and Material Engineering, Washington State University, Pullman, Washington 99163, United States.*

*c. School of Food Science, Washington State University, Pullman, Washington 99163, United States*

*d. School of Biological Sciences and Technology, University of Jinan, Jinan 250022, China.*

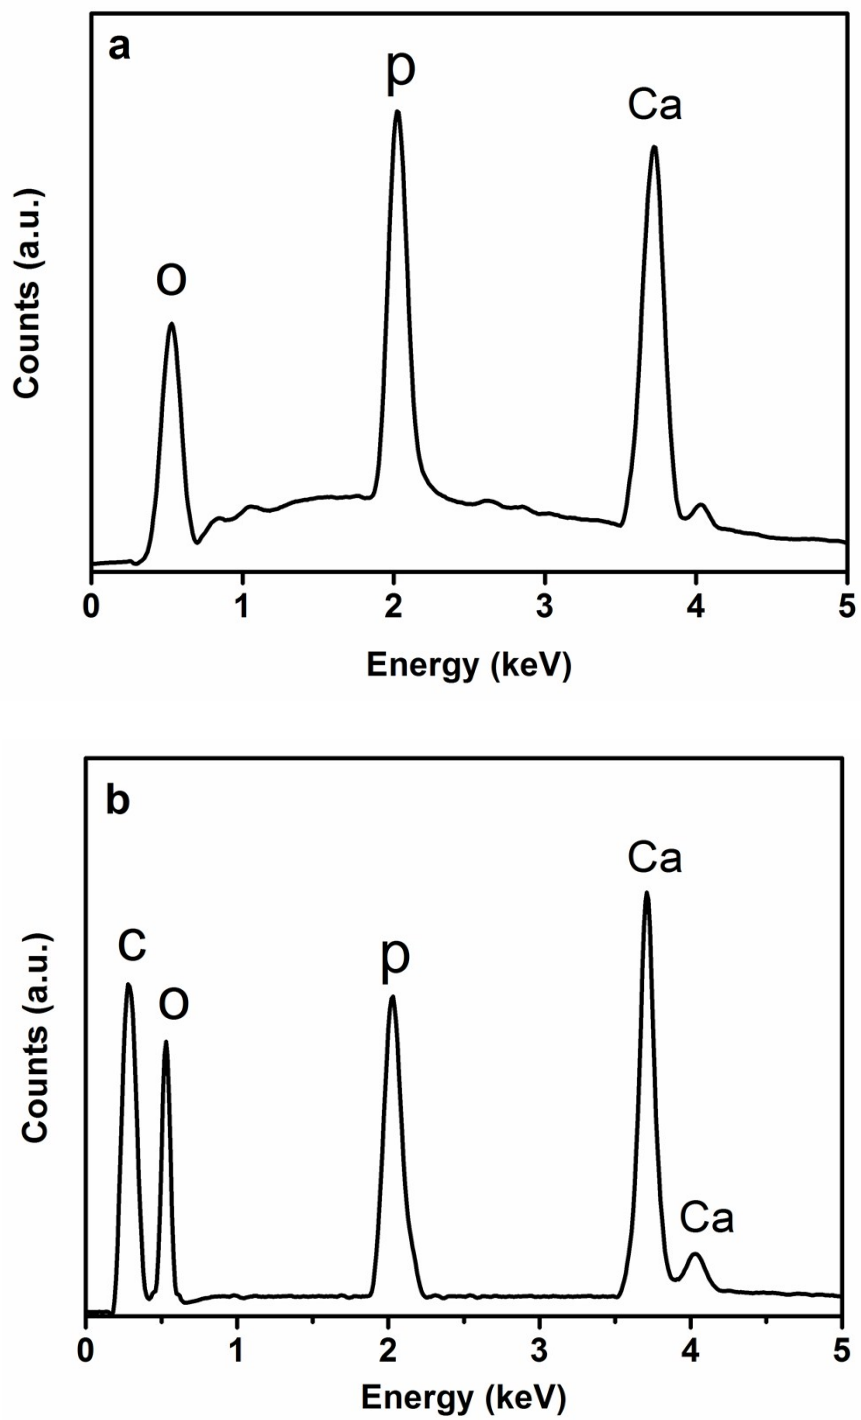

**Figure S1.** EDS spectra of  $\text{CaHPO}_4 \cdot 2\text{H}_2\text{O}$  (a) and Con A-invertase- $\text{CaHPO}_4$  hybrid nanoflowers (b).
